# Supplementary material for: Nitro-Oleic Acid in Seeds and Differently Developed Seedlings of Brassica napus L
Source: MDPI journal article supplement (doi:10.3390/plants9030406), 2020-03-24
Supplement: s1 [file s1]

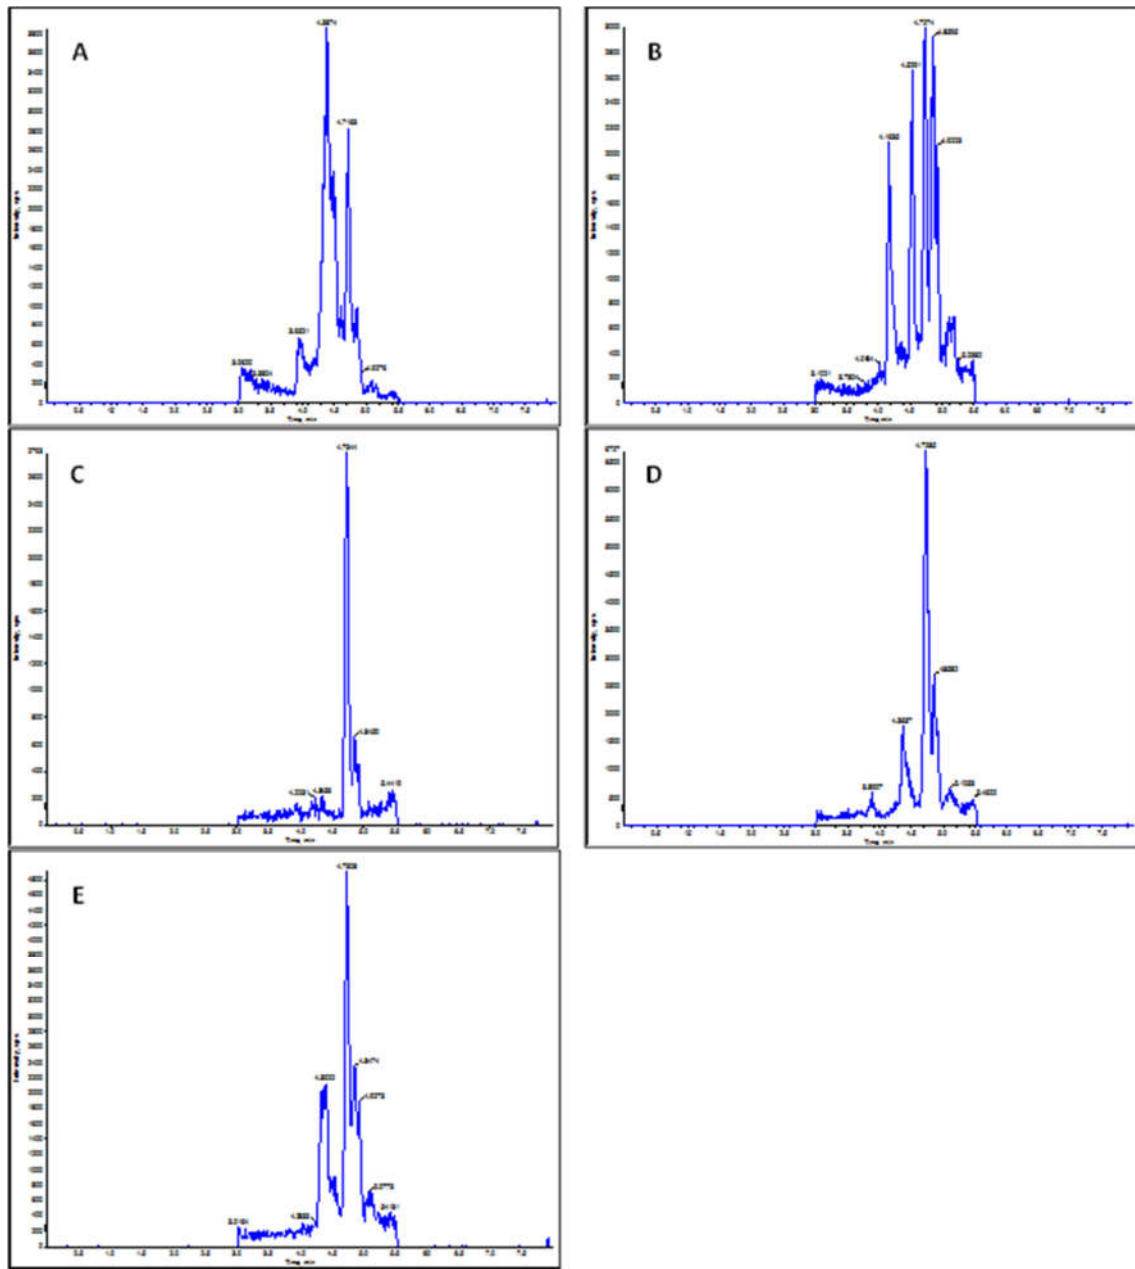

**Fig S1 Chromatograms of *B. napus* seedlings** (A) Ion chromatogram of m/z 326.5 of a sample derived from *Brassica napus* seed. (B) Ion chromatogram of m/z 326.5 of a sample derived from 2-day-old *Brassica napus* seedling. (C) Ion chromatogram of m/z 326.5 of a sample derived from 4-day-old *Brassica napus* seedling. (D) Ion chromatogram of m/z 326.5 of a sample derived from 7-day-old *Brassica napus* shoot. (E) Ion chromatogram of m/z 326.5 of a sample derived from 7-day-old *Brassica napus* root.
